# Supplementary material for: Construction and synergistic anticancer efficacy of magnetic targeting cabbage-like Fe3O4@MoS2@ZnO drug carriers
Source: Royal Society of Chemistry journal article supplement (doi:10.1039/c8tb00608c), 2018-01-01
Supplement: c8tb00608c1.pdf [file c8tb00608c1.pdf]

## Supporting Information for

### Construction and Synergistic Anticancer Efficacy of Magnetic Targeting Cabbage-like $\text{Fe}_3\text{O}_4@\text{MoS}_2@\text{ZnO}$ Drug Carriers

Yongmei Yang<sup>a,b</sup>, Baoyou Gong<sup>a</sup>, Ying Yang<sup>a</sup>, Anjian Xie<sup>a</sup>, Yuhua Shen<sup>a,\*</sup>, Manzhou Zhu<sup>a,\*</sup>

<sup>a</sup>College of Chemistry and Chemical Engineering, Collaborative innovation center of modern bio-manufacture, Anhui University, Hefei 230601, P. R. China.

<sup>b</sup>School of Chemistry and Chemical Engineering, Huangshan University, Huangshan 245041, P. R. China.

E-mail: s\_yuhua@163.com (Yuhua Shen), zmz@ahu.edu.cn (Manzhou Zhu)

Yongmei Yang:0000-0002-5922-4725, Baoyou Gong:0000-0003-1997-1985, Ying Yang:0000-0002-2724-1387,

Anjian Xie:0000-0002-2864-4823, Yuhua Shen:0000-0002-0527-4735, Manzhou Zhu:0000-0002-3068-7160.

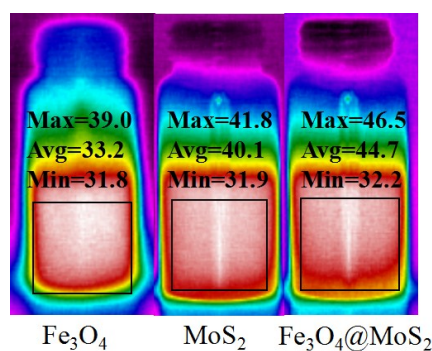

**Figure S1** Thermal infrared images of  $\text{Fe}_3\text{O}_4$ ,  $\text{MoS}_2$ ,  $\text{Fe}_3\text{O}_4@\text{MoS}_2$  dispersions with the concentration of 0.5 mg/mL under the irradiation of NIR laser (808 nm, 1 W/cm<sup>2</sup>) for 10 min.

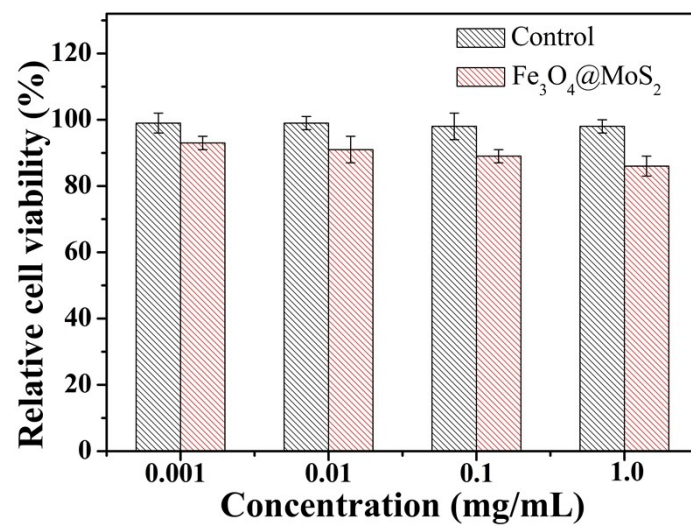

**Figure S2** Viability of HeLa cells incubated with different concentrations of Fe<sub>3</sub>O<sub>4</sub>@MoS<sub>2</sub>.
